# Supplementary material for: Telemedicine Use Among Caregivers of Cancer Patients: Systematic Review
Source: PubMed Central journal article supplement (PMC6028768; doi:10.2196/jmir.9812), 2018-06-18
Supplement: jmir_v20i6e223_app2.pdf [file jmir_v20i6e223_app2.pdf]

*Caregiver sample, study design and measured outcomes*

| <b>First author, date, reference</b> | <b>Study country</b> | <b>One site/ multisite</b> | <b>Sample</b>                                            | <b>Study design</b>                                                                                                                                                                                                                                                                              | <b>Outcome measure</b>                                                                                                                                                                                                                                                                                                 | <b>Questionnaires</b>                                                                                                                                                                                                                                                                                                                                                                             |
|--------------------------------------|----------------------|----------------------------|----------------------------------------------------------|--------------------------------------------------------------------------------------------------------------------------------------------------------------------------------------------------------------------------------------------------------------------------------------------------|------------------------------------------------------------------------------------------------------------------------------------------------------------------------------------------------------------------------------------------------------------------------------------------------------------------------|---------------------------------------------------------------------------------------------------------------------------------------------------------------------------------------------------------------------------------------------------------------------------------------------------------------------------------------------------------------------------------------------------|
| Shaw, 2016 [62]                      | Australia            | Multicenter                | N=128 gastrointestinal                                   | RCT<br>Two arms:<br>1) Family Connect telephone intervention (4 calls in 10 weeks after patient hospital discharge)<br>2) usual care<br><br>ASSESSMENT:<br>3 and 6 months                                                                                                                        | <ul style="list-style-type: none"> <li>- Quality of Life (QOL)</li> <li>- Caregiver Burden</li> <li>- Unmet supportive care needs</li> <li>- Distress</li> </ul>                                                                                                                                                       | <ul style="list-style-type: none"> <li>- SF12</li> <li>- Partner and Caregiver Supportive Care Needs Survey</li> <li>- Caregiver Reaction Assessment (disrupted schedule, financial problems, lack of family support, health impact and impact on self-esteem scales)</li> <li>- Distress Thermometer</li> </ul>                                                                                  |
| Dionne-Odom, 2016 [57]               | USA                  | Multicenter                | N=122 lung, gastrointestinal, genitourinary, hematologic | RCT<br>Two arms:<br>1) Early group: ENABLE III intervention within 60 days of diagnosis<br>2) Delayed group: 12 weeks later<br><br>ASSESSMENT: By telephone<br>At baseline, 6, 12, 18, and 24 weeks.<br>After Week 24, data collection every 12 weeks until patient's death, or study completion | <ul style="list-style-type: none"> <li>- Depression</li> <li>- Grief</li> </ul>                                                                                                                                                                                                                                        | <ul style="list-style-type: none"> <li>- CES-D</li> <li>- PG13</li> </ul>                                                                                                                                                                                                                                                                                                                         |
| Mosher, 2016 [69]                    | USA                  | Multicenter                | N=106 lung                                               | RCT<br>Two arms:<br>1) TSM group<br>2) Education/support group<br><br>ASSESSMENT:<br>4 weekly 45-minute telephone sessions<br>2 and 6 weeks post-intervention                                                                                                                                    | <ul style="list-style-type: none"> <li>- Anxiety</li> <li>- Confidence in their ability to help the patient manage symptoms</li> <li>- Caregivers' self-efficacy for managing their own emotions</li> <li>- Constraints on cancer-related disclosure from the other dyad member</li> <li>- Caregiver burden</li> </ul> | <ul style="list-style-type: none"> <li>- Generalized Anxiety Disorder seven-item scale (GAD-7)</li> <li>- 16-item standard self-efficacy scale</li> <li>- 8-item self-efficacy scale</li> <li>- five-item social constraints scale</li> <li>- Caregiver Reaction Assessment (impact on schedule, caregiver's esteem, lack of family support, impact on health, and impact on finances)</li> </ul> |

|                        |           |             |                                                                              |                                                                                                                                                                                                                                                                     |                                                                                                                   |                                                                                                                                                                                                                                                    |
|------------------------|-----------|-------------|------------------------------------------------------------------------------|---------------------------------------------------------------------------------------------------------------------------------------------------------------------------------------------------------------------------------------------------------------------|-------------------------------------------------------------------------------------------------------------------|----------------------------------------------------------------------------------------------------------------------------------------------------------------------------------------------------------------------------------------------------|
| Dionne-Odom, 2015 [56] | USA       | Multicenter | N=122<br>lung,<br>gastrointestinal,<br>breast, hematologic,<br>genitourinary | RCT<br>Two arms:<br>1) Early (fast track)<br>2) Delayed (3 months after diagnosis)<br><br>ASSESSMENT: by telephone once every 6 weeks until week 24 and then every 3 months until patient's death or study completion                                               | - Quality of Life<br>- Depression<br>- CG burden                                                                  | - CG QOL Scale–Cancer (CQOL-C)<br>- Center for Epidemiologic Study–Depression (CESD) Scale<br>- 14-item Montgomery–Borgatta CG Burden (MBCB) Scale                                                                                                 |
| Chambers, 2014 [71]    | Australia | Multicenter | N=336<br>lung,<br>gastrointestinal,<br>breast, hematologic,<br>genitourinary | RCT<br>Two arms:<br>1) Single-session nurse-led self-management intervention<br>2) 5-session psychologist cognitive behavioural intervention<br><br>ASSESSMENT:<br>Baseline (pre-intervention), 3, 6, and 12 months after recruitment                               | - Distress<br>- Post-traumatic growth                                                                             | - Brief Symptom Inventory-18 (BSI-18)<br>- Impact of Events Scale (IES)<br>- Posttraumatic Growth Inventory (PTGI)                                                                                                                                 |
| DuBenske, 2014 [51]    | USA       | Multicenter | N=246<br>lung                                                                | RCT<br>Two arms:<br>1) CHESS + Clinician Report group<br>2) Internet group<br><br>ASSESSMENT:<br>- Intervention time: up to 2 years, or 13 months after patient death<br>- Post-test surveys mailed to caregivers: every 2 months during the period of intervention | - Disruptiveness<br>- Caregiver Burden<br>- Negative mood<br>- Caregiver perception of patient's symptom distress | - Caregiver Quality of Life – Cancer Scale (CQOLC) Disruptiveness Subscale<br>- Caregiver Quality of Life – Cancer Scale (CQOLC) Burden Subscale<br>- Short Version Profile of Mood States (SV-POMS)<br>- Edmonton Symptom Assessment Scale (ESAS) |
| Kinney, 2014 [49]      | USA       | Multicenter | N=481<br>colorectal                                                          | RCT<br>Two arms:<br>1) TeleCARE group<br>2) Control group<br><br>ASSESSMENT: by telephone Baseline, 1 and 9 months after intervention                                                                                                                               | - colonoscopy use within 9 months after the intervention                                                          | - Risk Behaviour Diagnosis (RBD) Scale                                                                                                                                                                                                             |

|                      |     |             |                                                     |                                                                                                                                                                                                                                                                                                                                                                                                                                                                     |                                                                                                                                                                                                                                                                                                        |                                                                                                                                                                                                                                                                                                                                                                                                                                                                                                                                                                                                                                                                    |
|----------------------|-----|-------------|-----------------------------------------------------|---------------------------------------------------------------------------------------------------------------------------------------------------------------------------------------------------------------------------------------------------------------------------------------------------------------------------------------------------------------------------------------------------------------------------------------------------------------------|--------------------------------------------------------------------------------------------------------------------------------------------------------------------------------------------------------------------------------------------------------------------------------------------------------|--------------------------------------------------------------------------------------------------------------------------------------------------------------------------------------------------------------------------------------------------------------------------------------------------------------------------------------------------------------------------------------------------------------------------------------------------------------------------------------------------------------------------------------------------------------------------------------------------------------------------------------------------------------------|
| Northouse, 2014 [68] | USA | Multicenter | N=38<br>lung,<br>breast,<br>colorectal,<br>prostate | <p>Feasibility study<br/>All participants received the intervention</p> <p>ASSESSMENT:<br/>Web-based program: 3 sessions over a 6 weeks period, each session every 2 weeks to enable patient-caregiver dyads to learn information in a sequential manner</p> <p>T1 (baseline): web-based questionnaires. Dyads logged on to the program and completed sessions together.<br/>T2: Two weeks after finishing all three sessions, post-intervention questionnaires</p> | <p>Primary outcomes:</p> <ul style="list-style-type: none"> <li>- Emotional distress</li> <li>- Quality of life</li> </ul> <p>Secondary outcomes:</p> <ul style="list-style-type: none"> <li>- Appraisal</li> <li>- Coping resources</li> <li>- Social support</li> <li>- Self-efficacy</li> </ul>     | <ul style="list-style-type: none"> <li>- Profile of Mood States (POMS) (short form)</li> <li>- Functional Assessment of Cancer Therapy (FACT-G version 4)</li> <li>- Benefits of Illness Scale</li> <li>- Communication: Lewis Mutuality and Interpersonal Sensitivity Scale</li> <li>- Brief version of the Social Support Scale</li> <li>- Lewis Cancer Self-efficacy Scale</li> </ul>                                                                                                                                                                                                                                                                           |
| Badger , 2013 [70]   | USA | One center  | N=70<br>breast                                      | <p>RCT<br/>Two arms:<br/>1) Telephone interpersonal counseling (TIP-C)<br/>2) Telephone health education (THE)</p> <p>ASSESSMENT:<br/>8-week intervention<br/>At baseline, immediately after the intervention completion (8-week) and 8-week after completion</p>                                                                                                                                                                                                   | <ul style="list-style-type: none"> <li>- Depression</li> <li>- Negative Affect</li> <li>- Stress</li> <li>- Anxiety</li> <li>- Fatigue</li> <li>- Psychological distress</li> <li>- Social well-being</li> <li>- Spiritual well-being</li> <li>- Cancer Knowledge</li> <li>- Social Support</li> </ul> | <ul style="list-style-type: none"> <li>- 20-item Center for Epidemiological Studies-Depression Scale (CES-D)</li> <li>- 10-item negative affect subscale of the Positive and Negative Affect Schedule</li> <li>- Perceived Stress Scale</li> <li>- STAI</li> <li>- Multidimensional Fatigue Inventory</li> <li>- General Symptom Distress Scale</li> <li>- 8-item social well-being subscale of the Quality of Life Breast Cancer</li> <li>- 8-item spiritual well-being subscale of the Quality of Life Breast Cancer instrument</li> <li>- 20-item cancer knowledge measure developed for this study</li> <li>- Perceived Social Support—Family scale</li> </ul> |

|                    |     |             |                                                |                                                                                                                                                                                                                                                                                                                                                                                                                                                                                     |                                                                                                                                                                                      |                                                                                                                                                                                                                                                                                                                                                                                                                                                         |
|--------------------|-----|-------------|------------------------------------------------|-------------------------------------------------------------------------------------------------------------------------------------------------------------------------------------------------------------------------------------------------------------------------------------------------------------------------------------------------------------------------------------------------------------------------------------------------------------------------------------|--------------------------------------------------------------------------------------------------------------------------------------------------------------------------------------|---------------------------------------------------------------------------------------------------------------------------------------------------------------------------------------------------------------------------------------------------------------------------------------------------------------------------------------------------------------------------------------------------------------------------------------------------------|
| Badger , 2013 [60] | USA | One center  | N=52 breast                                    | <p>RCT</p> <p>Three arms:</p> <ol style="list-style-type: none"> <li>1) Telephone interpersonal counseling (TIP-C)</li> <li>2) Telephone health education (THE)</li> <li>3) Videophone interpersonal counselling (VC)</li> </ol> <p>ASSESSMENT: By telephone</p> <ul style="list-style-type: none"> <li>- T1: Baseline</li> <li>- T2: intervention completion (after 8-week)</li> <li>- T3: after 8-week from T2</li> </ul> <p>Intervention: 4 sessions in total, every 2 weeks</p> | <ul style="list-style-type: none"> <li>- Depression</li> <li>- Symptom distress</li> <li>- Social well-being</li> <li>- Spiritual well-being</li> <li>- User satisfaction</li> </ul> | <ul style="list-style-type: none"> <li>- Center for Epidemiological Studies-Depression Scale (CES-D)</li> <li>- General Symptom Distress Scale (GSDS)</li> <li>- 9-item social well-being scale</li> <li>- 7-item spiritual well-being scale</li> </ul>                                                                                                                                                                                                 |
| Clark, 2013 [67]   | USA | One center  | N=131 gastrointestinal, brain, head/neck, lung | <p>RCT</p> <p>Two arms:</p> <ol style="list-style-type: none"> <li>1) structured multidisciplinary intervention arm</li> <li>2) standard medical care (appointments, referrals to specialists)</li> </ol> <p>ASSESSMENT:</p> <p>T1: baseline</p> <p>T2; T1 + 4 weeks</p> <p>T3: T1 + 27 weeks</p>                                                                                                                                                                                   | <ul style="list-style-type: none"> <li>- Quality of Life</li> </ul>                                                                                                                  | <ul style="list-style-type: none"> <li>- Caregiver Quality of Life Index-Cancer Scale</li> </ul>                                                                                                                                                                                                                                                                                                                                                        |
| Chih, 2013 [55]    | USA | Multicenter | N=235 lung, breast, prostate                   | <p>RCT</p> <p>Two arms:</p> <ol style="list-style-type: none"> <li>1) CHESS - Only: access to an interactive cancer communication system</li> <li>2) CHESS + Clinician Report: access to an interactive cancer communication system plus an online symptom reporting system (Clinician Report)</li> </ol> <p>ASSESSMENT:</p> <p>6 and 12 months after intervention</p>                                                                                                              | <ul style="list-style-type: none"> <li>- caregiver negative mood</li> <li>- caregiving burden and preparedness</li> </ul>                                                            | <ul style="list-style-type: none"> <li>- Edmonton Symptom Assessment System (ESAS)</li> <li>- Eastern Cooperative Oncology Group Performance Status</li> <li>- 4-item caregiver Preparedness scale, a subscale of Family Care Inventory</li> <li>- 4-item caregiver Physical Burden scale, a subscale of the Caregiver Burden Inventory</li> <li>- subset of negative mood items from the Shortened Version Profile of Mood States (SV-POMS)</li> </ul> |

|                      |           |             |                                                                     |                                                                                                                                                                                                                                     |                                                                                                                                                                                                                                                                                                                |                                                                                                                                                                                                                                                                                                                                                                                                                                                                                   |
|----------------------|-----------|-------------|---------------------------------------------------------------------|-------------------------------------------------------------------------------------------------------------------------------------------------------------------------------------------------------------------------------------|----------------------------------------------------------------------------------------------------------------------------------------------------------------------------------------------------------------------------------------------------------------------------------------------------------------|-----------------------------------------------------------------------------------------------------------------------------------------------------------------------------------------------------------------------------------------------------------------------------------------------------------------------------------------------------------------------------------------------------------------------------------------------------------------------------------|
| Northouse, 2013 [59] | USA       | Multicenter | N=302<br>lung,<br>colorectal,<br>breast,<br>prostate                | RCT<br>Three arms:<br>1) Brief (3-session)<br>2) Extensive (6-session)<br>intervention<br>3) Control group (usual care)<br><br>ASSESSMENT:<br>Baseline: prior to intervention<br>Post-intervention: 3 and 6<br>months from baseline | Primary outcome:<br>- Quality of Life<br><br>Intermediary outcomes:<br>- Appraisals of illness/caregiving<br>- Uncertainty<br>- Hopelessness<br>- Coping<br>- Healthy Behaviour<br>- Interpersonal relationships<br>- Self-efficacy<br>- Communication<br>- Dyadic support<br>- Risk for distress              | - Functional Assessment of Cancer Treatment (FACT-G)<br>- Appraisal of Illness or Appraisal of Caregiving Scales<br>- Mishel Uncertainty in Illness Scale<br>- Beck Hopelessness Scale<br>- Brief Coping Orientations to Problems Experienced scale<br>- Scale to assess activities (e.g., exercise, nutrition, adequate sleep)<br>- Lewis Cancer Self-efficacy Scale<br>- Lewis Mutuality and Interpersonal Sensitivity Scale<br>- Social Support Questionnaire<br>- 77-item RFD |
| Hogberg, 2013 [63]   | Sweden    | One center  | N=6<br>haematological                                               | Feasibility study<br><br>ASSESSMENT:<br>Individual interviews were conducted 4 months after recruitment                                                                                                                             | - experiences of having access to the web-based communication function<br>- Question of what prevented or allowed the use of web-based communication for support                                                                                                                                               | The interviews were analysed by a content analysis                                                                                                                                                                                                                                                                                                                                                                                                                                |
| Scott, 2013 [50]     | Australia | One center  | N=13<br>early stage cancer                                          | Feasibility study<br><br>ASSESSMENT: by semi-structured interviews.<br>6 modules (released sequentially each week)<br>Post-treatment: 1 week<br>Follow-up: 3 months after programme completion                                      | - Negative affect<br>- Distress<br>- Quality of Life<br>- Programme engagement<br>- Qualitative feedback                                                                                                                                                                                                       | - 21-item Depression Anxiety Stress Scale<br>- 17-item Posttraumatic Stress Disorder Symptom Scale-Self Report<br>- EORTC QLQ-C30: Functional subscales of Physical, Emotional, Social, Role and the Global QOL scale                                                                                                                                                                                                                                                             |
| Stern, 2012 [48]     | Canada    | One center  | N=12<br>breast,<br>lung,<br>bowel,<br>prostate,<br>kidney,<br>brain | Feasibility study<br><br>ASSESSMENT:<br>Length of exposure to home telehealth: 3.5 months (range: 2 weeks – 6 months)                                                                                                               | A) Enhanced access to care:<br>- Ease of access to a health care professional<br>- Reassurance with visual access to care<br>- Enhanced access to pain and symptom management<br><br>B) Usability of the home telehealth system:<br>- Lack of integration of nursing services<br>- Inappropriate timing of the | Qualitative analysis conducted on<br>- data from interviews (caregivers, patients and tele-nurses)<br>- direct observations (families engaged in video-based communication with tele-nurses)<br>- computerized nursing documentation.<br><br>All interviews were audio recorded and transcribed verbatim                                                                                                                                                                          |

|                     |     |             |                |                                                                                                                                                                                                                                                                                                                                                                                                                                                                                                                                                                                   |                                                                                                                                                                                                                                                                                                                                                                                          |                                                                                                                                                                                                                                               |
|---------------------|-----|-------------|----------------|-----------------------------------------------------------------------------------------------------------------------------------------------------------------------------------------------------------------------------------------------------------------------------------------------------------------------------------------------------------------------------------------------------------------------------------------------------------------------------------------------------------------------------------------------------------------------------------|------------------------------------------------------------------------------------------------------------------------------------------------------------------------------------------------------------------------------------------------------------------------------------------------------------------------------------------------------------------------------------------|-----------------------------------------------------------------------------------------------------------------------------------------------------------------------------------------------------------------------------------------------|
|                     |     |             |                |                                                                                                                                                                                                                                                                                                                                                                                                                                                                                                                                                                                   | <ul style="list-style-type: none"> <li>- intervention</li> <li>- Lack of portability of the equipment</li> <li>- Technical challenges</li> <li>- Ease of use of the equipment</li> </ul>                                                                                                                                                                                                 |                                                                                                                                                                                                                                               |
| Namkoong, 2012 [58] | USA | Multicenter | N=285 lung     | <p>RCT<br/>Two arms:</p> <ol style="list-style-type: none"> <li>1) CHESS group: access to the CHESS website as well as a laptop computer and Internet access.</li> <li>2) Control group: usual care, a laptop computer with Internet access if needed, and a list of high-quality patient-directed lung cancer and palliative care websites (e.g., cancer.gov and alcase.org) based on clinician recommendations.</li> </ol> <p>ASSESSMENT:<br/>Pre-test surveys prior to randomization<br/>Post-test surveys: every 2 months after receipt of the intervention for two years</p> | <ul style="list-style-type: none"> <li>- Caregiver comfort using the Internet</li> <li>- Caregiver perception of patient's symptom distress</li> <li>- Bonding: universality, group cohesiveness, informational and emotional support</li> <li>- Appraisal and Problem-focused Coping Strategies</li> <li>- Active behavioural coping</li> <li>- Seeking instrumental support</li> </ul> | <ul style="list-style-type: none"> <li>- 5-item bonding scale</li> <li>- Brief Cope questionnaire</li> </ul>                                                                                                                                  |
| Schover, 2012 [53]  | USA | One center  | N=186 prostate | <p>RCT<br/>Three arms:</p> <ol style="list-style-type: none"> <li>1) [3-month waitlist (WL)]</li> <li>2) 3-session face-to-face format (FF)</li> <li>3) an internet-based format with email contact with the therapist (WEB1)</li> <li>4) second internet-based group (WEB2) was added to further examine the relationship between web site usage and outcomes</li> </ol> <p>ASSESSMENT:<br/>At baseline, post-waitlist, post-treatment, and at 3-, 6-, and 12-</p>                                                                                                               | <ul style="list-style-type: none"> <li>- Erectile dysfunction</li> <li>- Female sexual function</li> <li>- Emotional distress</li> <li>- Relationship satisfaction</li> </ul>                                                                                                                                                                                                            | <ul style="list-style-type: none"> <li>- International Index of Erectile Function (IIEF)</li> <li>- Female Sexual Function Index (FSFI)</li> <li>- Brief Symptom Inventory (BSI-18)</li> <li>- abbreviated Dyadic Adjustment Scale</li> </ul> |

|                   |     |             |                                                     |                                                                                                                                                                                                                                                                                                      |                                                                                                                                                        |                                                                                                                                                                                                                                                                                                                                                                                                                                                |
|-------------------|-----|-------------|-----------------------------------------------------|------------------------------------------------------------------------------------------------------------------------------------------------------------------------------------------------------------------------------------------------------------------------------------------------------|--------------------------------------------------------------------------------------------------------------------------------------------------------|------------------------------------------------------------------------------------------------------------------------------------------------------------------------------------------------------------------------------------------------------------------------------------------------------------------------------------------------------------------------------------------------------------------------------------------------|
|                   |     |             |                                                     | month                                                                                                                                                                                                                                                                                                |                                                                                                                                                        |                                                                                                                                                                                                                                                                                                                                                                                                                                                |
| Zulman, 2012 [65] | USA | Multicenter | N=38<br>lung,<br>colorectal,<br>breast,<br>prostate | Feasibility study<br>4 focus group and usability testing.                                                                                                                                                                                                                                            | 5 core modules:<br>- Family involvement<br>- Optimistic attitude<br>- Coping effectiveness<br>- Uncertainty reduction<br>- Symptom management          | Transcripts of the recorded groups were analysed by two members of the content team to identify themes and representative quotes.                                                                                                                                                                                                                                                                                                              |
| Badger, 2011 [64] | USA | Multicenter | N=70<br>prostate                                    | RCT<br>Two arms:<br>1) Telephone interpersonal counselling (TIP-C)<br>2) Health education attention condition (HEAC)<br><br>ASSESSMENT: By telephone<br>T1: Baseline<br>T2: T1 + 8 weeks<br>T3: T2 + 8 weeks<br><br>Intervention:<br>4 calls in total, every 2 weeks                                 | - Depression<br>- Positive and Negative Affect<br>- Symptom distress<br>- Fatigue<br>- Social well-being<br>- Spiritual well-being<br>- Social Support | - 20-item Center for Epidemiological Studies-Depression Scale (CES-D)<br>- 20-item Positive and Negative Affect Schedule<br>- Perceived Stress Scale (PSS)<br>- Multidimensional Fatigue Inventory<br>- 8-item social well-being modified subscale of the Quality of Life Breast Cancer<br>- 8-item spiritual well-being subscale of the modified Quality of Life Breast Cancer instrument<br>- Perceived Social Support—Family scale (PSS-FA) |
| Porter, 2011 [61] | USA | Multicenter | N=233<br>lung                                       | RCT<br>Two arms:<br>1) Caregiver-assisted Coping skills training group (CST)<br>2) Education/support group<br><br>ASSESSMENT: By telephone<br>T1: Baseline<br>T2: post-treatment immediately after intervention's completion<br>T3: T2 + 4-month<br><br>Intervention:<br>14 telephone-based sessions | - psychological distress<br>- caregiver strain<br>- self-efficacy for helping the patient manage symptoms                                              | - Profile of Mood States-B (POMS-B)<br>- Caregiver Strain Index (CSI)<br>- Chronic Pain Self-Efficacy scale (modified version)                                                                                                                                                                                                                                                                                                                 |

|                      |     |             |                             |                                                                                                                                                                                                                                                                                                                                                                                                            |                                                                                                                                                                                                                                                                                                                                                                                                             |                                                                                                                                                                                                                                                                                                                                                                                                                                                                                                                                                                                                                               |
|----------------------|-----|-------------|-----------------------------|------------------------------------------------------------------------------------------------------------------------------------------------------------------------------------------------------------------------------------------------------------------------------------------------------------------------------------------------------------------------------------------------------------|-------------------------------------------------------------------------------------------------------------------------------------------------------------------------------------------------------------------------------------------------------------------------------------------------------------------------------------------------------------------------------------------------------------|-------------------------------------------------------------------------------------------------------------------------------------------------------------------------------------------------------------------------------------------------------------------------------------------------------------------------------------------------------------------------------------------------------------------------------------------------------------------------------------------------------------------------------------------------------------------------------------------------------------------------------|
| Northouse, 2007 [52] | USA | Multicenter | N=235 prostate              | <p>RCT</p> <p>Two arms:</p> <ol style="list-style-type: none"> <li>1) FOCUS program group</li> <li>2) Usual care</li> </ol> <p>Assessment:<br/>Baseline, and 4, 8, 12 months after intervention's completion</p>                                                                                                                                                                                           | <ul style="list-style-type: none"> <li>- Quality of life</li> <li>- Appraisals of illness/caregiving</li> <li>- Uncertainty</li> <li>- Hopelessness</li> <li>- Coping strategies</li> <li>- Self-efficacy</li> <li>- Communication</li> <li>- General symptom distress</li> <li>- Extent to which husbands' prostate-specific symptoms created problems for spouses</li> <li>- Risk for distress</li> </ul> | <ul style="list-style-type: none"> <li>- Medical Outcomes Study 12-item short form (MOS SF-12)</li> <li>- Functional Assessment of Cancer Treatment (FACT-G)</li> <li>- Appraisal of Illness or Appraisal of Caregiving Scales</li> <li>- Mishel Uncertainty in Illness Scale</li> <li>- Beck Hopelessness Scale</li> <li>- Brief Coping Orientations to Problems Experienced scale</li> <li>- Lewis Cancer Self-Efficacy Scale</li> <li>- Lewis Mutuality and Interpersonal Sensitivity Scale</li> <li>- Omega Screening Questionnaire (OSQ)</li> <li>- 4-item spousal version of the EPIC</li> <li>- 77-item RFD</li> </ul> |
| Northouse, 2005 [54] | USA | Multicenter | N=134 breast                | <p>RCT</p> <p>Two arms:</p> <ol style="list-style-type: none"> <li>1) FOCUS program group</li> <li>2) Usual care</li> </ol> <p>ASSESSMENT:<br/>Baseline, 3-months after initial phase completion, and 6-months after booster phase completion of the program</p>                                                                                                                                           | <ul style="list-style-type: none"> <li>- Appraisal of illness</li> <li>- Appraisal of caregiving</li> <li>- Uncertainty</li> <li>- Hopelessness</li> <li>- Coping</li> <li>- Quality of life</li> </ul>                                                                                                                                                                                                     | <ul style="list-style-type: none"> <li>- Appraisal of Illness Scale</li> <li>- Appraisal of Caregiving Scale</li> <li>- Uncertainty in Illness Scale</li> <li>- Beck Hopelessness Scale</li> <li>- Brief COPE</li> <li>- Functional Assessment of Cancer Treatment (FACT-G)</li> <li>- SF-36</li> </ul>                                                                                                                                                                                                                                                                                                                       |
| Farnham, 2002 [66]   | USA | One center  | N=49 bone marrow transplant | <p>RCT</p> <p>Two arms:</p> <ol style="list-style-type: none"> <li>1) HutchWorld group: computers with access to the Internet and HutchWorld</li> <li>2) Control group: no access to the Internet in their apartments</li> </ol> <p>ASSESSMENT:<br/>Baseline, monthly and weekly questionnaires for up to 3 months + debriefing session at the end of the study (feedback on HutchWorld and the study)</p> | <ul style="list-style-type: none"> <li>- Quality of Life</li> <li>- Social support</li> <li>- Internet and web-based program usage patterns</li> </ul>                                                                                                                                                                                                                                                      | Not specified                                                                                                                                                                                                                                                                                                                                                                                                                                                                                                                                                                                                                 |



|  |  |  |  |                                                                                        |  |  |
|--|--|--|--|----------------------------------------------------------------------------------------|--|--|
|  |  |  |  | itself)<br>Participants submitted their questionnaires using a self-addressed envelope |  |  |
|--|--|--|--|----------------------------------------------------------------------------------------|--|--|

## Abbreviations

BSI-18: Brief Symptom Inventory-18

CESD: Center for Epidemiological Studies- Depression scale

CHESS: Comprehensive Health Enhancement Support System

CQOL-C: Caregiver Quality of Life Index-Cancer scale

CSI: Caregiver Strain Index

CST: Caregiver-assisted Coping skills training group

ENABLE: Educate Nurture Advise Before Life Ends

EORTC QLQ-C30: European Organisation for Research and Treatment of Cancer Quality of Life Core Questionnaire

ESAS: Edmonton Symptom Assessment Scale

FSFI: Female Sexual Function Index

HEAC: Health education attention condition

GAD-7: Generalized Anxiety Disorder seven-item scale

GSDS: General Symptom Distress Scale

IES: Impact of Events Scale

IIEF: International Index of Erectile Function

MBCB: Montgomery–Borgatta CG Burden scale

MOS SF-12: Medical Outcomes Study 12-item short form

OSQ: Omega Screening Questionnaire

PG13: Prolonged Grief scale

PSS: Perceived Stress Scale

SV-POMS: Shortened Version Profile of Mood States

PTGI: Posttraumatic Growth Inventory

RBD: Risk Behaviour Diagnosis Scale

RCT: randomized controlled trial

RFD: Risk for Distress scale

SF 12: 12-Item Short Form Survey

STAI: State-Trait Anxiety Inventory

SV-POMS: Short Version Profile of Mood States

TIP-C: Telephone interpersonal counseling

THE: Telephone health education

TSM: Telephone-based Symptom Management
